# Supplementary material
Source: Elsevier journal article supplement (https://www.sciencedirect.com/science/article/pii/S2254887421000667)

**Supplementary material**  
Appendix B, annex 1 (Table)

**Table 1.** General characteristics of of the sample according to CURB-65.

|                                      | <b>CURB-65 &lt;1<br/>(n=94)</b> | <b>CURB-65 ≥2<br/>(n=151)</b> | <b><i>p</i></b> |
|--------------------------------------|---------------------------------|-------------------------------|-----------------|
| Age (m, SD, years)                   | 54 ± 14.6                       | 64 ± 13                       | < 0.001         |
| Male sex (n, %)                      | 59 (63%)                        | 114 (76%)                     | 0.033           |
| <b>Personal history (n,%)</b>        |                                 |                               |                 |
| Hypertension                         | 34 (36.2%)                      | 86 (57%)                      | 0.002           |
| Diabetes mellitus                    | 22 (23.4%)                      | 46 (30.5%)                    | 0.23            |
| Overweight/Obesity                   | 19 (20.2%)                      | 51 (34%)                      | 0.02            |
| Smoker                               | 3 (3.2%)                        | 12 (7.9%)                     | 0.131           |
| Ex-smoker                            | 6 (6.4%)                        | 16 (10.6%)                    | 0.262           |
| Heart disease                        | 0 (0%)                          | 11 (7.3%)                     | 0.007           |
| Ictus                                | 3 (3.2%)                        | 4 (2.6%)                      | 0.804           |
| COPD                                 | 3 (3.2%)                        | 6 (4%)                        | 0.752           |
| Chronic kidney disease               | 2 (2,1%)                        | 9 (6%)                        | 0.159           |
| Cancer                               | 1 (1,1%)                        | 4 (2.6%)                      | 0.393           |
| <b>Usual treatment (n,%)</b>         |                                 |                               |                 |
| ACEI                                 | 6 (6.5%)                        | 20 (13.3%)                    | 0.092           |
| Angiotensin II receptor blockers     | 25 (26.6%)                      | 55 (36.4%)                    | 0.111           |
| Metformin                            | 19 (20.2%)                      | 30 (20%)                      | 0.968           |
| Insuline                             | 1 (1.1%)                        | 13 (8.6%)                     | 0.013           |
| <b>Clinical manifestations (n,%)</b> |                                 |                               |                 |
| COVID contact (+)                    | 28 (30%)                        | 36 (24%)                      | 0.317           |
| Days from symptom onset              | 8.39 ± 4.3                      | 8.25 ± 4.46                   | 0.807           |
| Fever                                | 78 (83%)                        | 133 (88%)                     | 0.261           |
| Fatigue                              | 69 (73.4%)                      | 131 (86.8%)                   | 0.009           |
| Cough                                | 83 (89.2%)                      | 125 (82.5%)                   | 0.167           |
| Shortness of breath                  | 86 (91.5%)                      | 138 (91.4%)                   | 0.979           |
| Anosmia                              | 7 (7.4%)                        | 9 (6%)                        | 0.647           |

|                                           |                 |                 |         |
|-------------------------------------------|-----------------|-----------------|---------|
| Ageusia                                   | 5 (5.3%)        | 4 (2.6%)        | 0.28    |
| Diarrhea                                  | 20 (21.3%)      | 39 (25.8%)      | 0.418   |
| Nausea                                    | 5 (5.3%)        | 13 (8.6%)       | 0.337   |
| Headache                                  | 33 (35.5%)      | 51 (33.8%)      | 0.785   |
| Systolic blood pressure (m,SD)            | 126 ± 19        | 117 ± 23        | 0.005   |
| Distolic blood pressure (m,SD)            | 76 ± 10         | 72 ± 14         | 0.013   |
| Baseline oxygen saturation (m,SD)         | 88 ± 9          | 81 ± 15         | < 0.001 |
| Heart rate (m,SD)                         | 97 ± 17         | 100 ± 19        | 0.241   |
| Respiratory rate (m,SD)                   | 25 ± 5          | 27 ± 6          | 0.002   |
| Altered mental status                     | 2 (2.1%)        | 30 (19.9%)      | < 0.001 |
| Skin rash                                 | 0 (0%)          | 3 (2%)          | 0.169   |
| Crepitantes                               | 64 (68.1%)      | 92 (60.9%)      | 0.257   |
| Wheezing                                  | 9 (9.6%)        | 26 (16.6%)      | 0.124   |
| Roncus                                    | 21 (22.3%)      | 55 (36.4%)      | 0.02    |
| Edema in lower extremities                | 3 (3.2%)        | 7 (4,6%)        | 0.578   |
| <b>Blood test upon admission (n,%)</b>    |                 |                 |         |
| Hemoglobin (m,SD,g/dL)                    | 13.3 ± 1.5      | 13.2 ± 2.2      | 0.577   |
| Leukocytes (m,SD,cells/mm <sup>3</sup> )  | 11019 ± 6579    | 12298 ± 6230    | 0.127   |
| Lymphocytes (m,SD,cells/mm <sup>3</sup> ) | 1148 ± 856      | 1483 ± 2765     | 0.255   |
| Platelets (m,SD,cells/mm <sup>3</sup> )   | 291806 ± 140535 | 276250 ± 144525 | 0.419   |
| C-reactive protein (m,SD,mg/L)            | 254 ± 330       | 290 ± 231       | 0.39    |
| Ferritin (m,SD,ng/mL)                     | 991 ± 635       | 1968 ± 2893     | 0.33    |
| LDH (m,SD,UL)                             | 453 ± 245       | 508 ± 251       | 0.158   |
| D-dimer (m,SD,ng/mL)                      | 1581 ± 1838     | 2596 ± 3366     | 0.091   |
| Urea (m,SD,mg/dL)                         | 42 ± 47         | 53 ± 37         | 0.069   |
| Creatinine (m,SD,mg/dL)                   | 0.92 ± 0.18     | 1.32 ± 0.69     | 0.059   |
| GOT (m,SD,UI/L)                           | 61 ± 57         | 75 ± 68         | 0.169   |
| GPT (m,SD,UI/L)                           | 62 ± 70         | 69 ± 99         | 0.621   |
| Prothrombin time(m,SD,sec)                | 13.9 ± 2.5      | 14.9 ± 9.2      | 0,567   |
| APTT (m,SD,seg)                           | 32.2 ± 6.9      | 32.9 ± 7.6      | 0.633   |

|                                                                        |             |             |       |
|------------------------------------------------------------------------|-------------|-------------|-------|
| Sodium (m,SD,mEq/L)                                                    | 139 ± 5.2   | 138 ± 5.4   | 0.117 |
| Potassium (m,SD,mEq/L)                                                 | 4.3 ± 0.8   | 4.4 ± 1     | 0.805 |
| IL-6 (m,SD,pg/mL)                                                      | 95 ± 106    | 339 ± 726   | 0.187 |
| <b>Chest x-ray alterations (n=232, % in each group)</b>                |             |             |       |
| Radiography without alterations                                        | 6 (6,9%)    | 2 (1.4%)    | 0.027 |
| Unilobar pneumonia                                                     | 8 (9%)      | 18 (12.6%)  | 0.398 |
| Multilobar bilateral pneumonia                                         | 6 (6,7%)    | 15 (10.5%)  | 0.333 |
| Bilateral pneumonia                                                    | 67 (75.3%)  | 121 (84.6%) | 0.078 |
| Pleural effusion                                                       | 7 (7.9%)    | 27 (18,9%)  | 0.021 |
| Cardiomegaly                                                           | 14 (15.7%)  | 22 (15.4%)  | 0.944 |
| <b>Chest CT alterations (n=157, % in each group)</b>                   |             |             |       |
| Ground-glass opacity                                                   | 52 (94.5%)  | 93 (91.2%)  | 0.448 |
| Involvement of patched                                                 | 32 (58.2%)  | 61 (60.4%)  | 0.788 |
| Bilateral involvement                                                  | 49 (89.1%)  | 92 (90.2%)  | 0.827 |
| Interstitial pattern                                                   | 20 (37%)    | 67 (65.7%)  | 0.001 |
| <b>Microbiological tests (n,%)</b>                                     |             |             |       |
| SARS-CoV-2 positive nasopharyngeal swab (n=54)                         | 28 (51.9%)  | 26 (48.1%)  | 0.985 |
| Nasopharyngeal swab positive for influenza A and B (n=74, 8 positives) | 2 (2,7%)    | 6 (8.1%)    | 0.885 |
| Pneumococcal antigenuria (n=73, 1 positive)                            | 0 (0%)      | 1 (1.4%)    | 0.594 |
| <b>Prognostic variables (n,%)</b>                                      |             |             |       |
| Admission to ICU                                                       | 38 (41%)    | 79 (53%)    | 0.058 |
| Days of admission in ICU (m,SD)                                        | 5 ± 9.2     | 6 ± 9.1     | 0.4   |
| Total days of hospital stay (m,SD)                                     | 12.6 ± 11.3 | 12.2 ± 10.8 | 0.805 |
| Required oxygen therapy                                                | 86 (91.5%)  | 128 (84.8%) | 0.124 |
| Required IMV                                                           | 34 (36.2%)  | 83 (55%)    | 0.005 |
| ARDS                                                                   | 46 (49.8%)  | 104 (68.9%) | 0.002 |

|                                                          |            |            |        |
|----------------------------------------------------------|------------|------------|--------|
| Acute renal failure                                      | 9 (9.6%)   | 55 (36.4%) | <0.001 |
| Septic shock                                             | 16 (17%)   | 53 (35.1%) | 0.002  |
| DIC                                                      | 0 (0%)     | 4 (2.6%)   | 0.11   |
| Hydroelectrolytic alterations                            | 25 (26.6%) | 42 (27.8%) | 0.835  |
| Ictus                                                    | 2 (2.2%)   | 7 (4.6%)   | 0.317  |
| Acute coronary syndrome                                  | 1 (1.1%)   | 5 (3.3%)   | 0.273  |
| PE                                                       | 1 (1.1%)   | 0 (0%)     | 0.203  |
| DVT                                                      | 0 (0%)     | 1 (0.7%)   | 0.43   |
| Death                                                    | 16 (17%)   | 86 (57%)   | <0.001 |
| Discharge at home                                        | 47 (50%)   | 36 (24%)   | <0.001 |
| <b>Managed treatments (n,%)</b>                          |            |            |        |
| Hydroxychloroquine                                       | 62 (66%)   | 102 (68%)  | 0.797  |
| Azithromycin                                             | 74 (78.7%) | 116 (77%)  | 0.729  |
| Lopinavir/Ritonavir                                      | 63 (67%)   | 102 (68%)  | 0.932  |
| Oseltamivir                                              | 27 (29.7%) | 32 (22%)   | 0.161  |
| Tocilizumab                                              | 13 (14%)   | 49 (33%)   | 0.001  |
| Nitazoxanide                                             | 13 (14%)   | 23 (15%)   | 0.741  |
| Ivermectin                                               | 3 (3.2%)   | 4 (2.7%)   | 0.825  |
| Prophylactic LMWH                                        | 48 (52%)   | 78 (52%)   | 0.911  |
| Therapeutic LMWH                                         | 14 (15%)   | 45 (30%)   | 0.008  |
| Corticosteroids                                          | 61 (64.9%) | 98 (65.3%) | 0.944  |
| Days from onset of symptoms to start of treatment (m,SD) | 8 ± 7.8    | 7.6 ± 5    | 0.602  |
| Duration of treatment (m,SD)                             | 10 ± 7.6   | 8.8 ± 7    | 0.204  |

ACEI: Angiotensin-converting-enzyme inhibitors; APTT: activated partial thromboplastin time; ARDS: acute respiratory distress syndrome; COPD: chronic obstructive pulmonary disease; CURB-65: Confusion, Urea > 42mg/dL, Respiratory rate > 30, Blood pressure < 90 mmHg (systolic) or < 60 mmHg (diastolic), 65 years old or older; GOT: glutamic oxaloacetic transaminase; GPT: glutamic pyruvic transaminase; DIC: disseminated intravascular coagulation; DVT: deep vein thrombosis; ICU: Intensive Care Unit; IL-6: interleukin 6; IMV: Invasive mechanical ventilation; LDH: Lactate dehydrogenase; LMWH: low-molecular-weight heparin prophylaxis dosing; NF: nasopharynx; PE: pulmonary thromboembolism; SD: standard deviation.

Figure 2. ROC curve to predict 30-day mortality of CURB-65 and qSOFA.

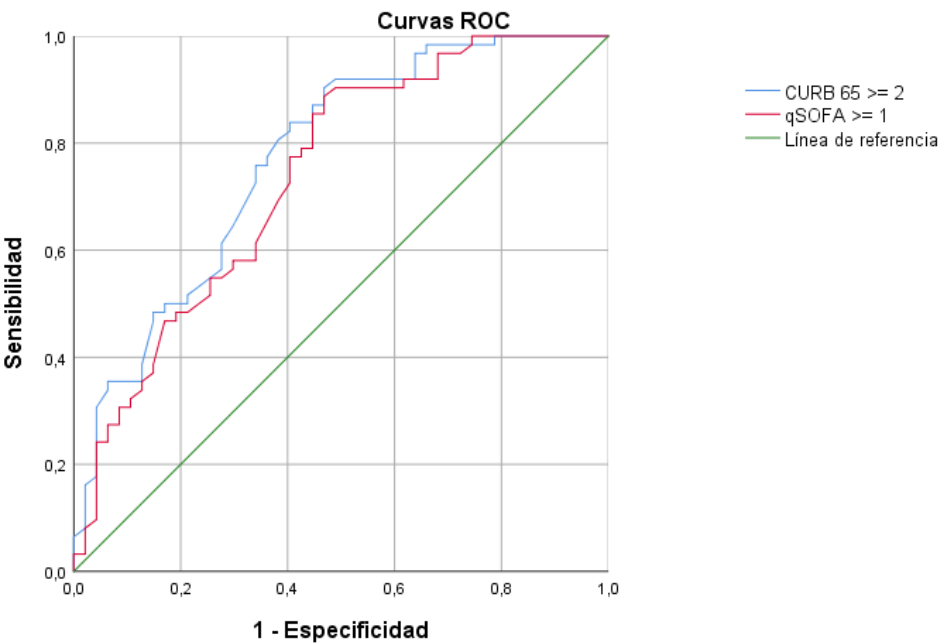

Supplement: mmc1 [file S2254887421000667:mmc1.pdf]
